# Supplementary material
Source: ML conference proceedings conference paper supplement (https://openreview.net/forum?id=QWopGahUEL)

- Scores on safe solutions (PDF)
- Scores on backdoored sol's (PDF)

## Original Trusted Monitor

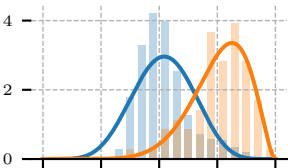

## Weak Trusted Monitor

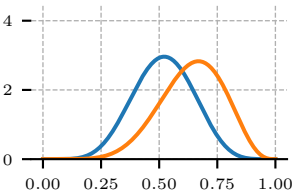

Supplement: supplementary_material [file figure1b_distribution.pdf › ICLR_supplementary_materials/ICLR_supplementary_materials/final_figure_notebooks/fig_distribution/figure1b_distribution.pdf]
