# Supplementary material
Source: ML conference proceedings conference paper supplement (https://openreview.net/forum?id=QWopGahUEL)

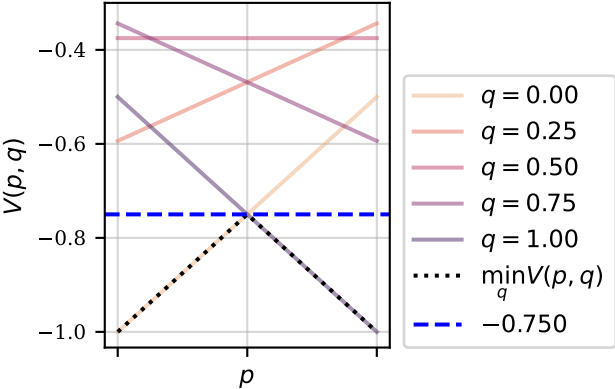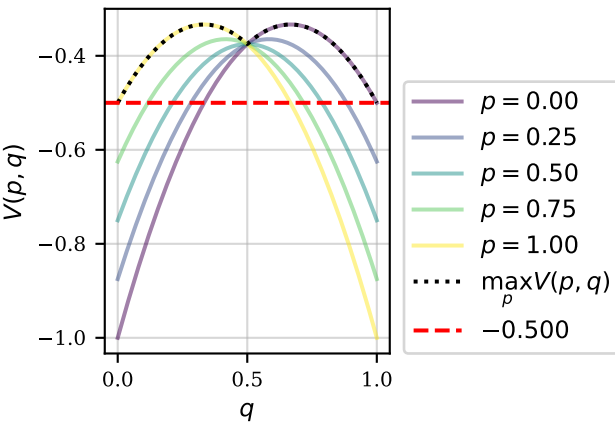

Supplement: supplementary_material [file appendix_minimax_maximin.pdf › ICLR_supplementary_materials/ICLR_supplementary_materials/final_figure_notebooks/app_minimax/appendix_minimax_maximin.pdf]

Original Trusted Monitor

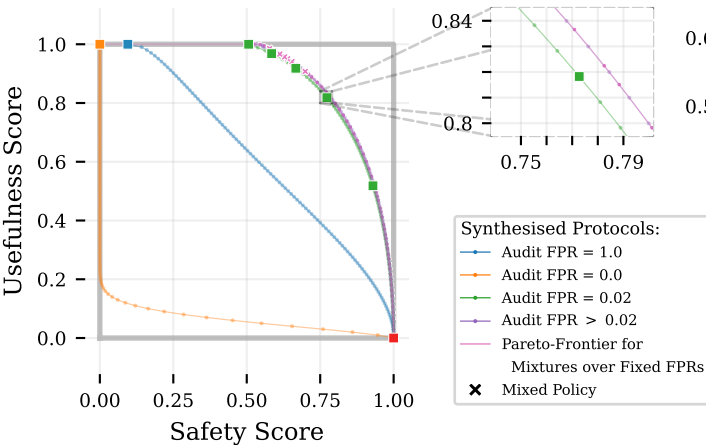

Weak Trusted Monitor

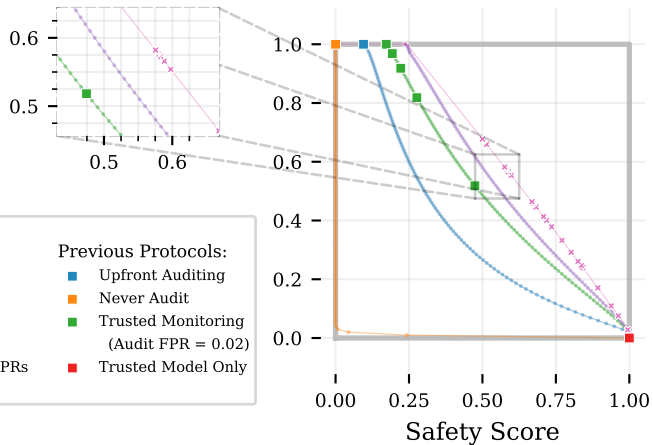

Supplement: supplementary_material [file figure2_frontier.pdf › ICLR_supplementary_materials/ICLR_supplementary_materials/final_figure_notebooks/fig_frontier/figure2_frontier.pdf]

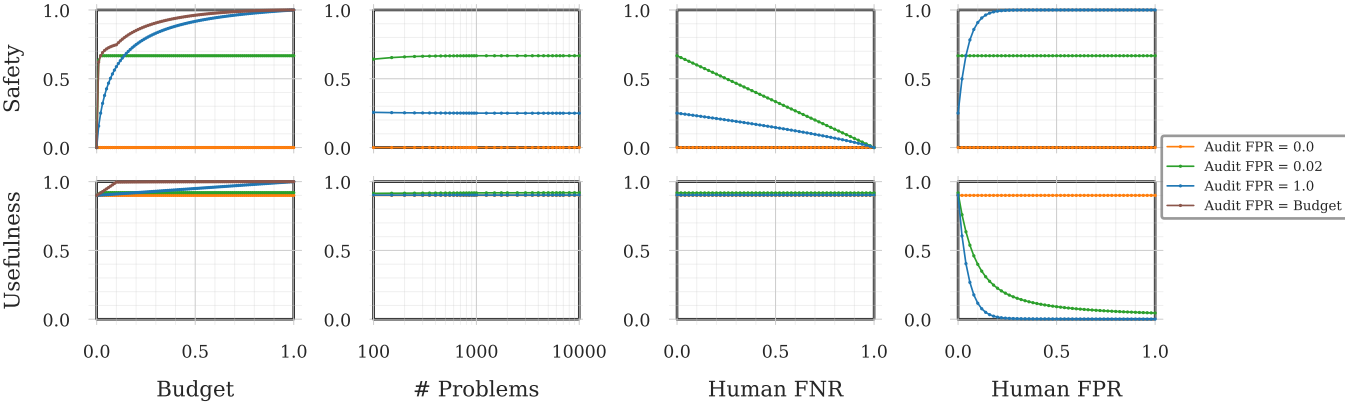

Supplement: supplementary_material [file figure3_trends_20240911_112552.pdf › ICLR_supplementary_materials/ICLR_supplementary_materials/final_figure_notebooks/fig_trends/figure3_trends_20240911_112552.pdf]
